# Supplementary material for: A toolbox of nanobodies developed and validated for use as intrabodies and nanoscale immunolabels in mammalian brain neurons
Source: eLife journal article supplement (doi:10.7554/elife.48750), 2019-09-30
Supplement: supp [file elife-48750-supp-v1.zip]

Archive with 11 entries (11 files):
- elife_poa_e48750_Supplementary_file_1.docx
- elife_poa_e48750_Figure_1_figure_supplement_2.tif
- elife_poa_e48750_Supplementary_file_2.docx
- elife_poa_e48750_Figure_1_figure_supplement_3.tif
- elife_poa_e48750_Supplementary_file_4.docx
- elife_poa_e48750_Supplementary_file_3.docx
- elife_poa_e48750_Figure_1_figure_supplement_5.tif
- elife_poa_e48750_Figure_1_figure_supplement_1.tif
- elife_poa_e48750_Figure_1_figure_supplement_4.tif
- elife_poa_e48750_Figure_1_figure_supplement_6.tif
- elife_poa_e48750_Transparent_Reporting_File.pdf
