# Supplementary material for: A toolbox of nanobodies developed and validated for use as intrabodies and nanoscale immunolabels in mammalian brain neurons
Source: eLife journal article supplement (doi:10.7554/elife.48750), 2019-09-30
Supplement: supp [file elife-48750-supp-v1.zip › elife_poa_e48750_Supplementary_file_2.docx]

**Supplementary Table 2. Immunogens used for llama immunization**

| **Immunogen** | **Fragment region (UniProt ID)** | **Tag** |
| --- | --- | --- |
| Homer1 | amino acids 121-363 (C-terminus) of mouse Homer1L (Q9Z2Y3) | - |
| IRSp53 | amino acids 1-250 (N-terminus) of human IRSp53/BAIAP2 (Q9UQB8) | GST |
| SAPAP2 | amino acids 76-244 (N-terminus) of rat SAPAP2 (P97837) | - |
| Gephyrin | amino acids 1-181 (N-terminus) of human Gephyrin (Q9NQX3) | - |
| AMIGO-1 | amino acids 395-493 (cytoplasmic C-terminus) of mouse AMIGO-1 (Q80ZD8) | GST |
