# Supplementary material for: A toolbox of nanobodies developed and validated for use as intrabodies and nanoscale immunolabels in mammalian brain neurons
Source: eLife journal article supplement (doi:10.7554/elife.48750), 2019-09-30
Supplement: supp [file elife-48750-supp-v1.zip › elife_poa_e48750_Supplementary_file_3.docx]

**Supplementary Table 3. Primers used for heavy chain repertoire cloning**

| **Forward primers** |  |
| --- | --- |
| VH1 (Sfi I) | 5’-CATGCCATGACTCGCGGCCCAGGCGGCCATGGCCCAGGTGCAGCTGGTGCAGTCTGG-3’ |
| VH3 (Sfi I) | 5’-CATGCCATGACTCGCGGCCCAGGCGGCCATGGCCGAGGTGCAGCTGGTGGAGTCTGG-3’ |
| VH4 (Sfi I) | 5’-CATGCCATGACTCGCGGCCCAGGCGGCCATGGCCCAGGTGCAGCTGCAGGAGTCGGG-3’ |
| F1 (Sfi I) | 5’-CATGCCATGACTGTGGCCCAGGCGGCCATGCAGKTGCAGCTCGTGGAGTC-3’ |
| F2 (Sfi I) | 5’-CATGACTGTGGCCCAGGCGGCCATGCAGGTGCAGCTCGTGGASWCHGGNGGAGGMTTGGT-3’ |
| VHH1BACK (Sfi I) | 5’-GTTATTACTCGCGGCCCAGGCGGCCATGGCCCAGGTSMARCTGCAGSAGTCWGG-3’ |
| CHH6BACK (Sfi I) | 5’-T GTTATTATCTGCGGCCCAGGCGGCCATGGCCGATGTGCAGCTGCAGGCGTCTGGRGGAGG-3’ |
| **Reverse primer** |  |
| JH | 5’-CCACGATTCTGGCCGGCCTGGCCTGAGGAGACRGTGACCTGGGTCC-3’ |
