# Supplementary figures and images for: A toolbox of nanobodies developed and validated for use as intrabodies and nanoscale immunolabels in mammalian brain neurons
Source: eLife journal article supplement (doi:10.7554/elife.48750), 2019-09-30

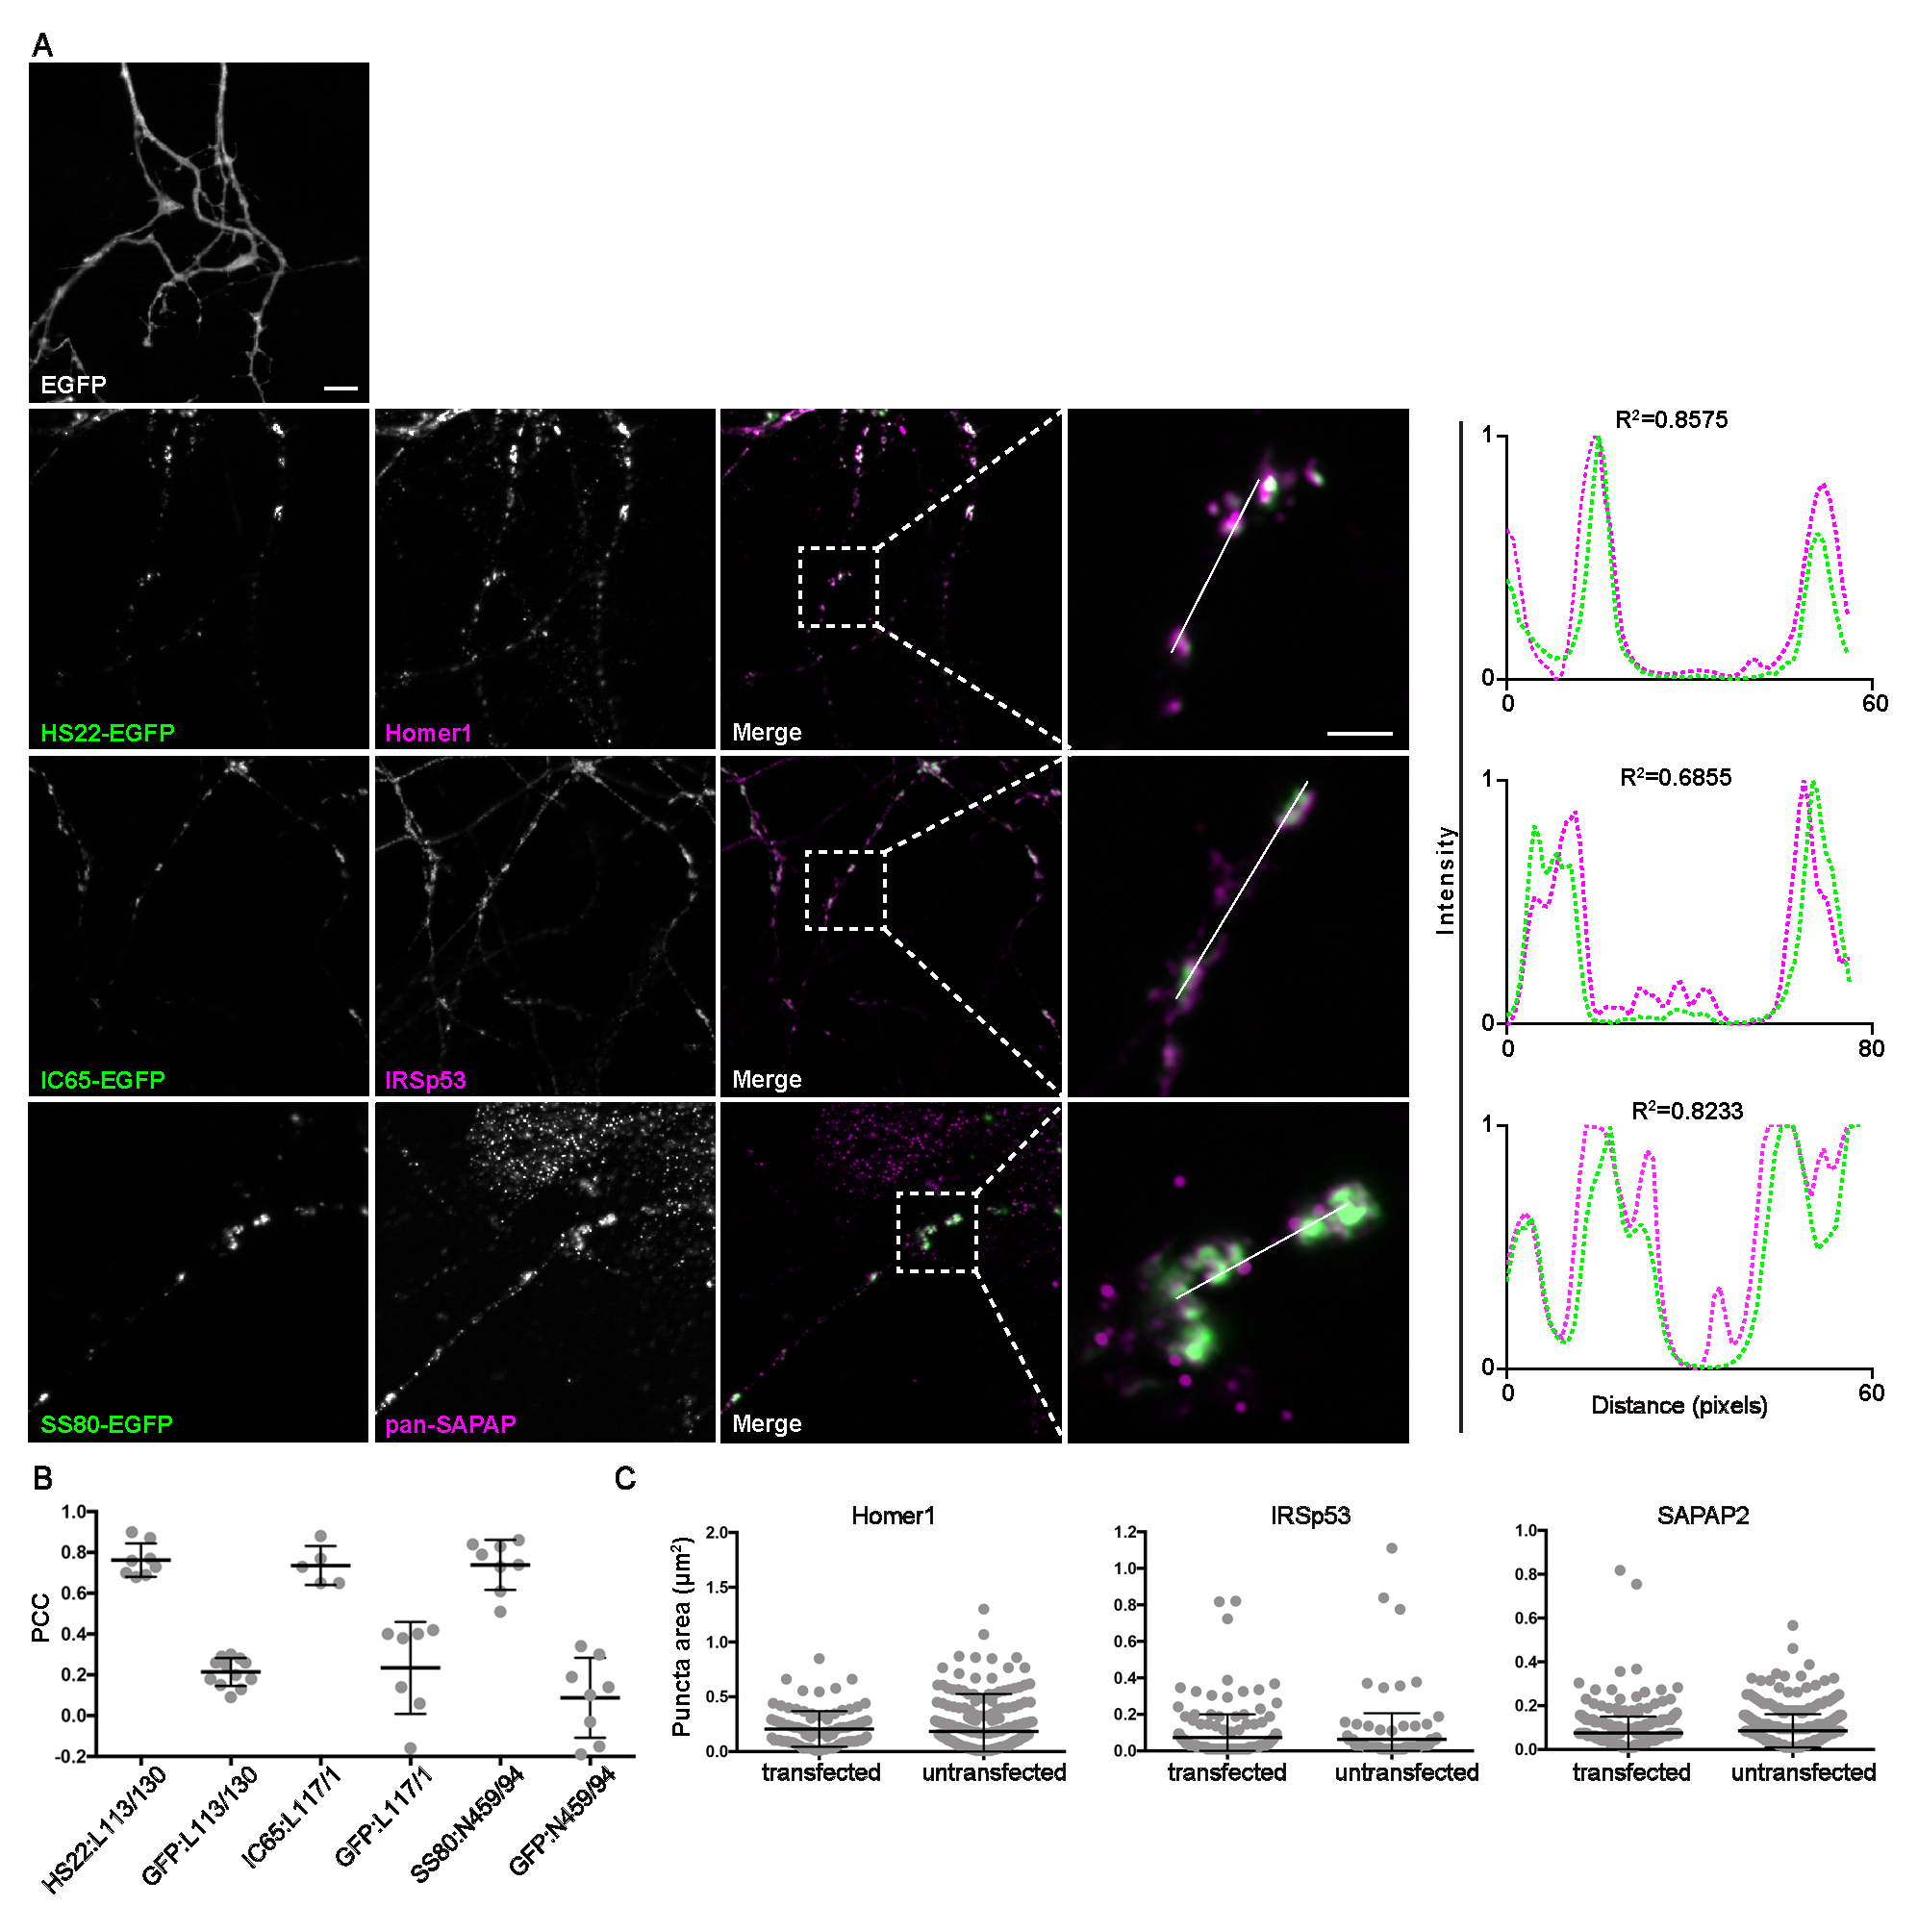

Supplement: supp [file elife-48750-supp-v1.zip › elife_poa_e48750_Figure_1_figure_supplement_2.tif]

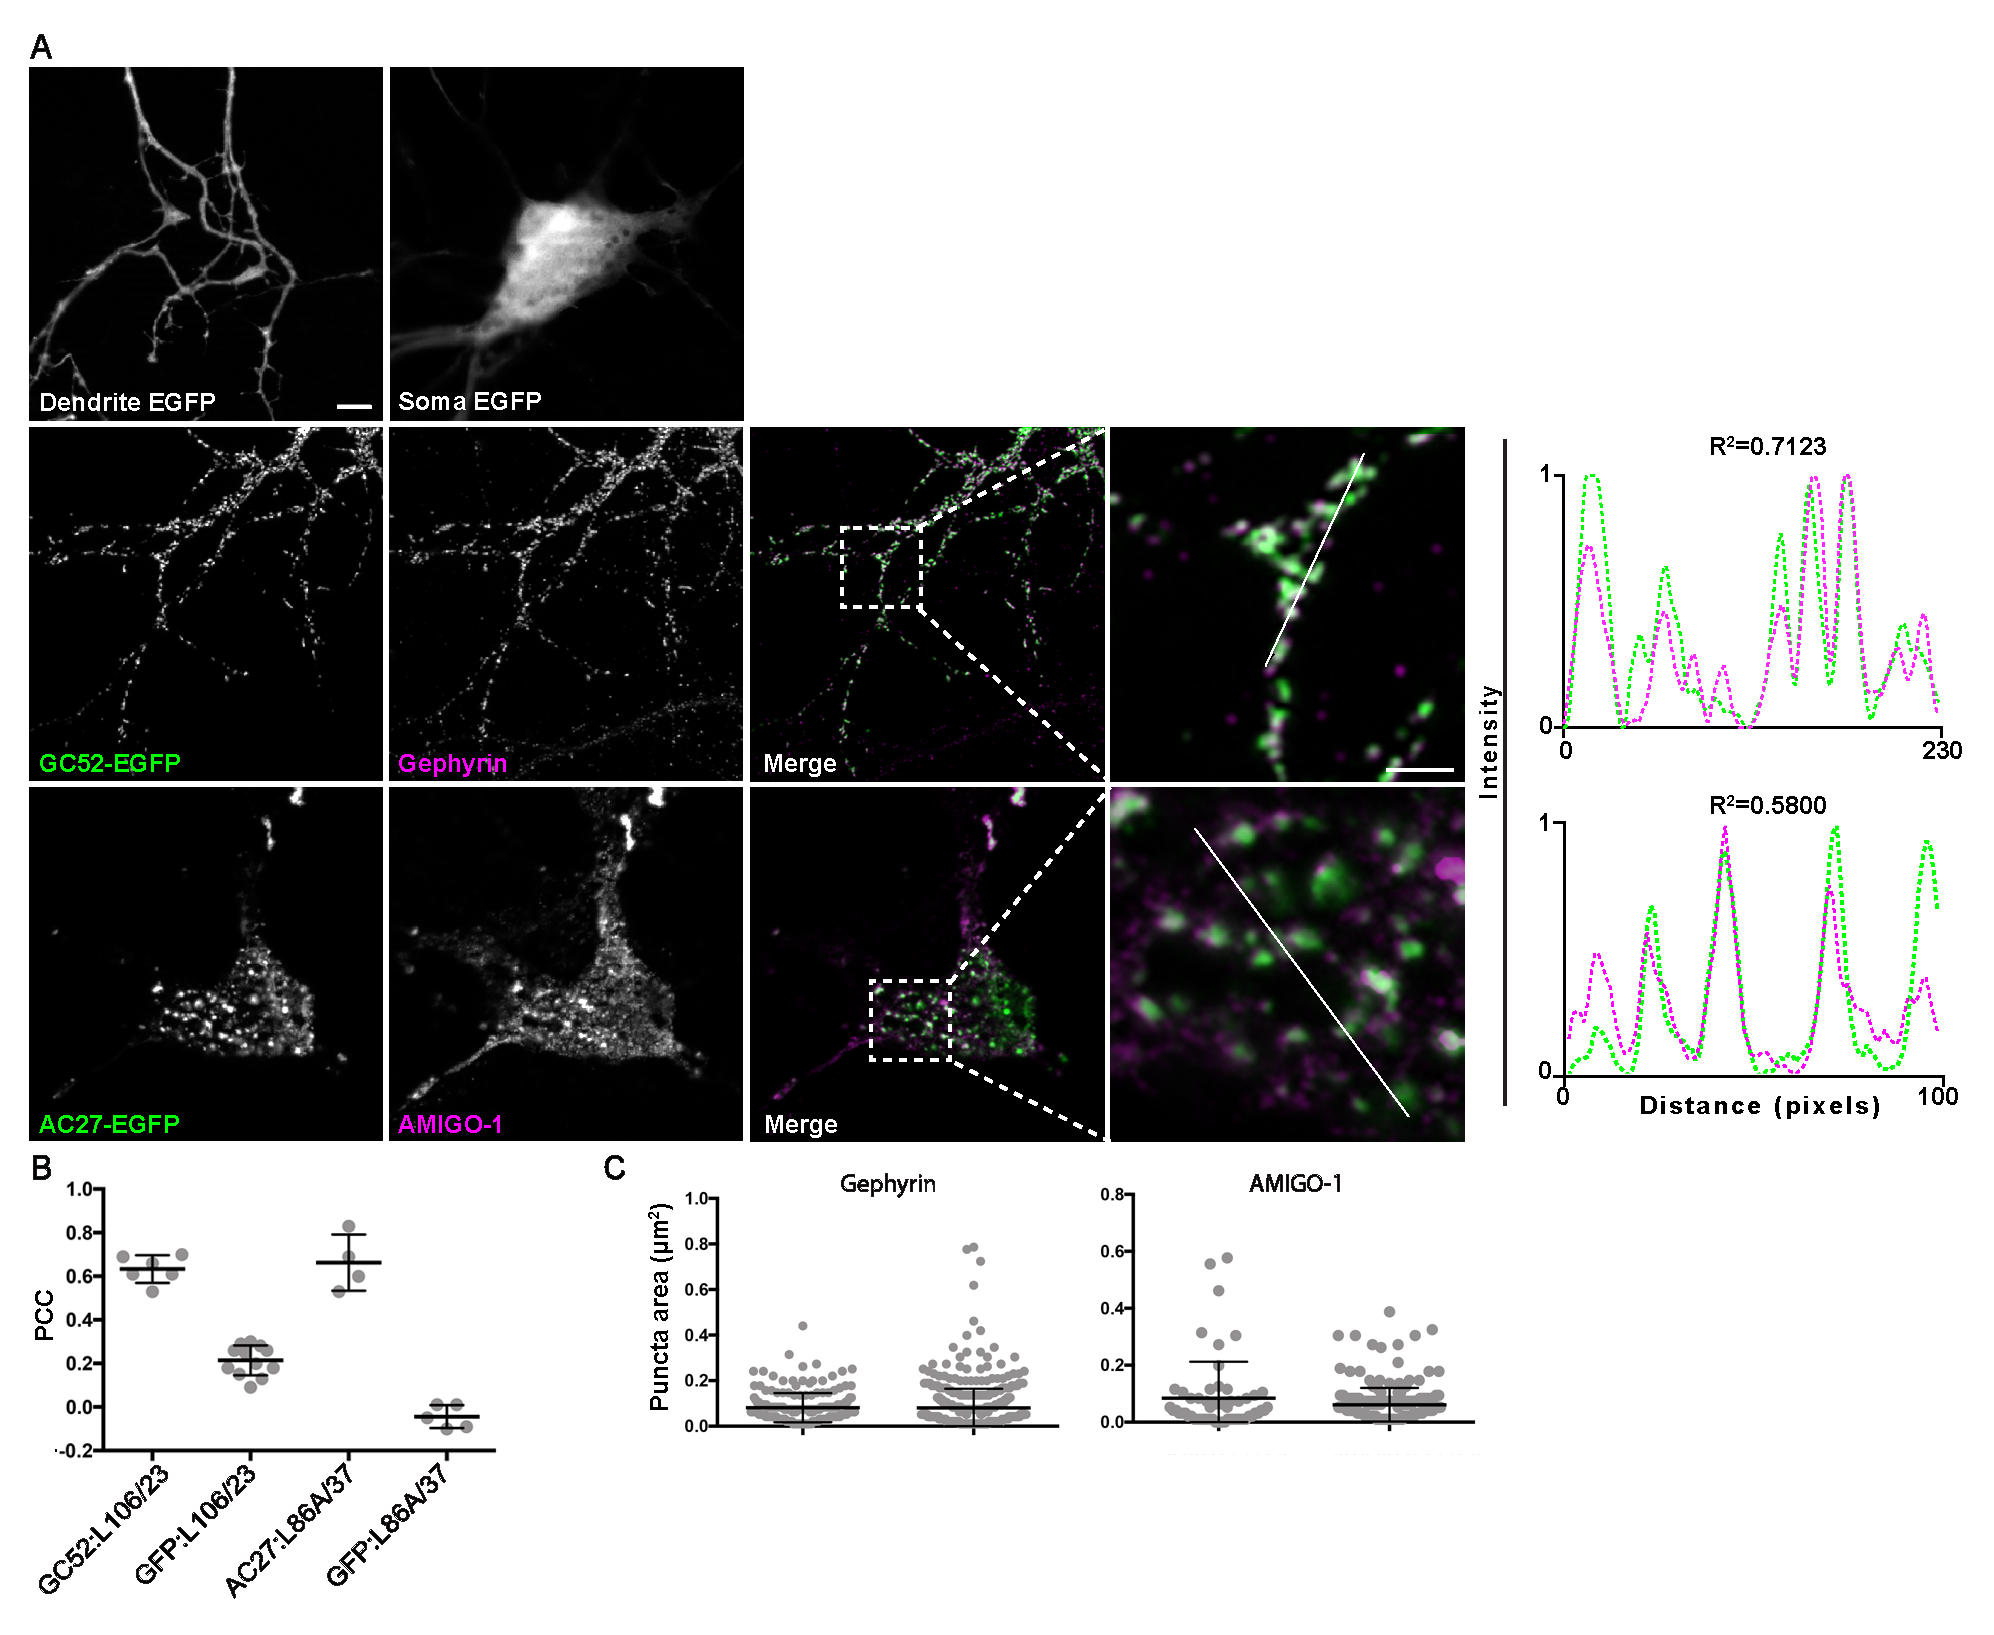

Supplement: supp [file elife-48750-supp-v1.zip › elife_poa_e48750_Figure_1_figure_supplement_3.tif]

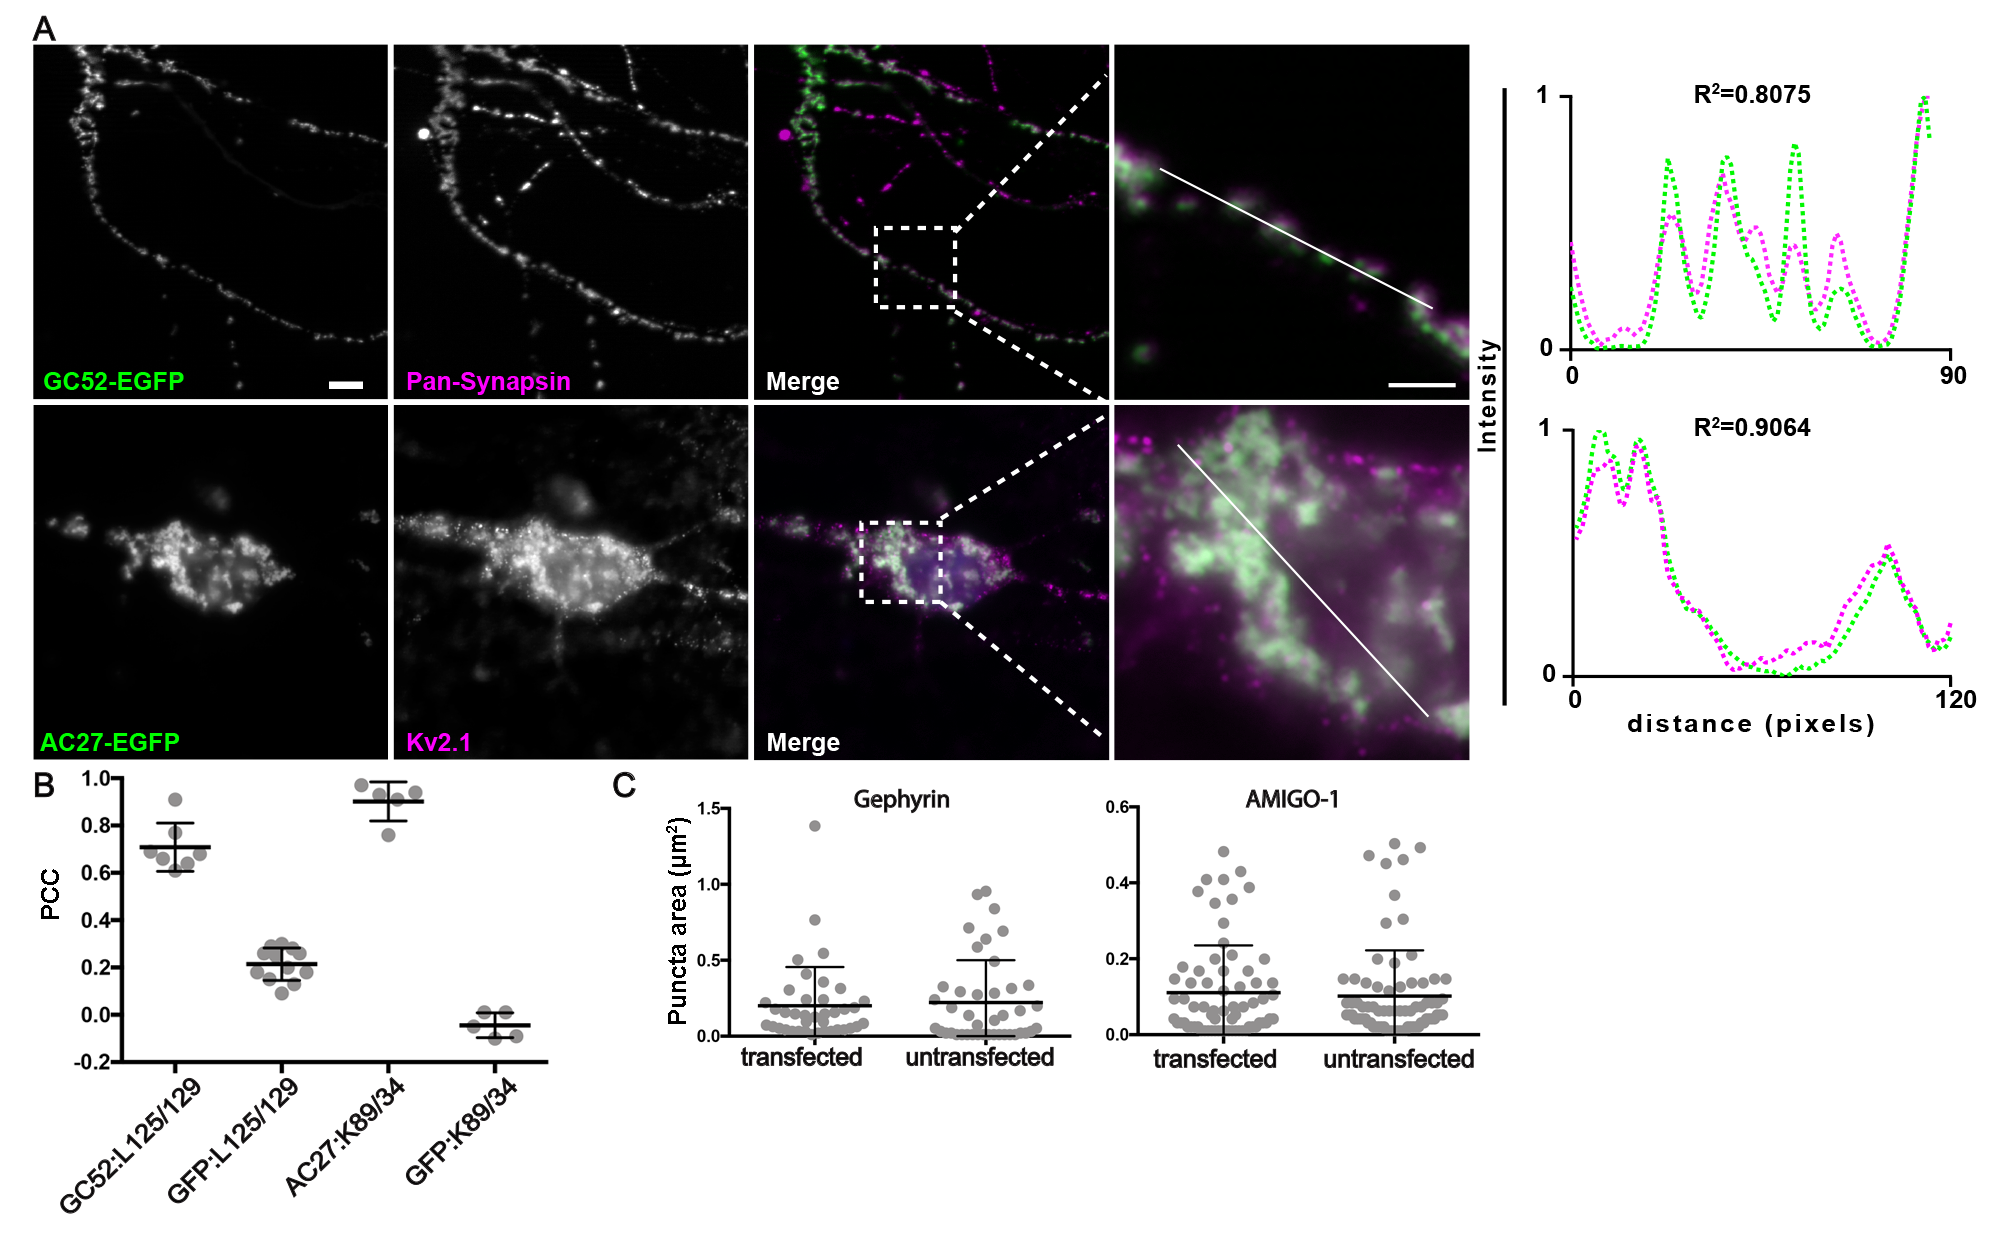

Supplement: supp [file elife-48750-supp-v1.zip › elife_poa_e48750_Figure_1_figure_supplement_5.tif]

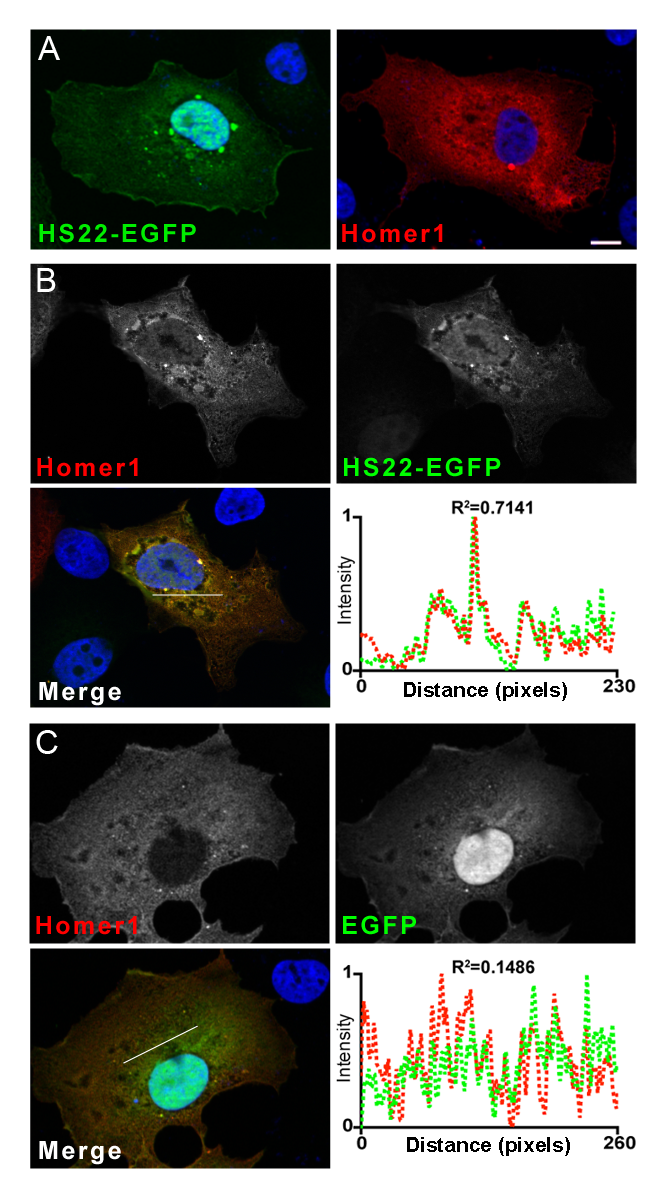

Supplement: supp [file elife-48750-supp-v1.zip › elife_poa_e48750_Figure_1_figure_supplement_1.tif]

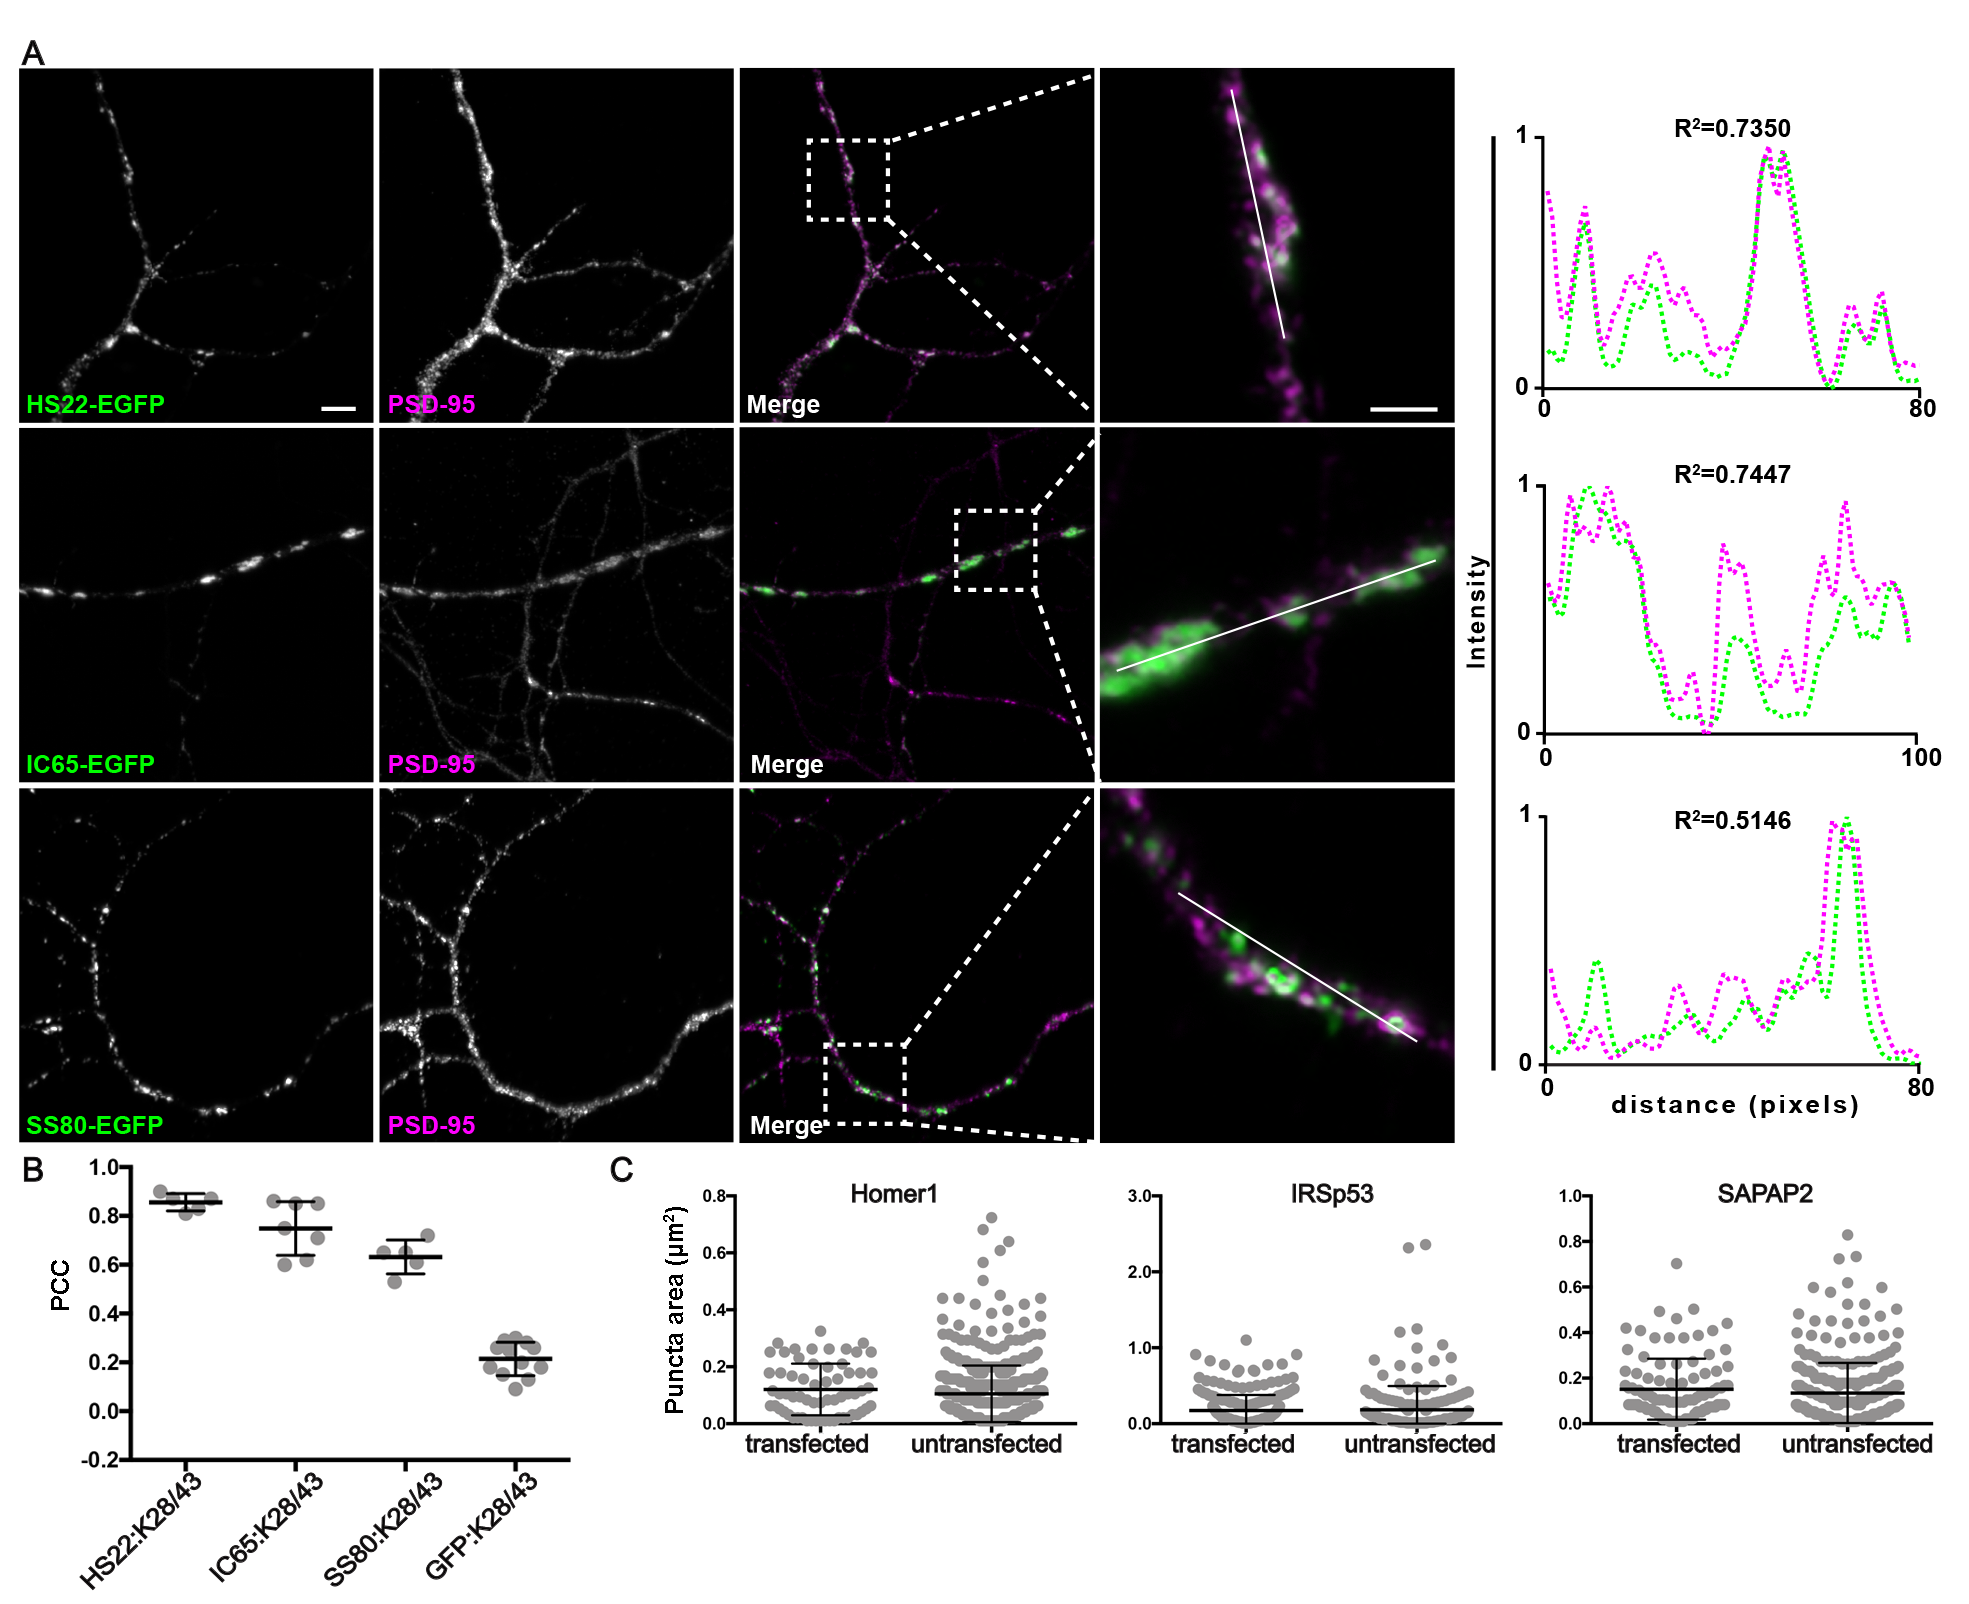

Supplement: supp [file elife-48750-supp-v1.zip › elife_poa_e48750_Figure_1_figure_supplement_4.tif]

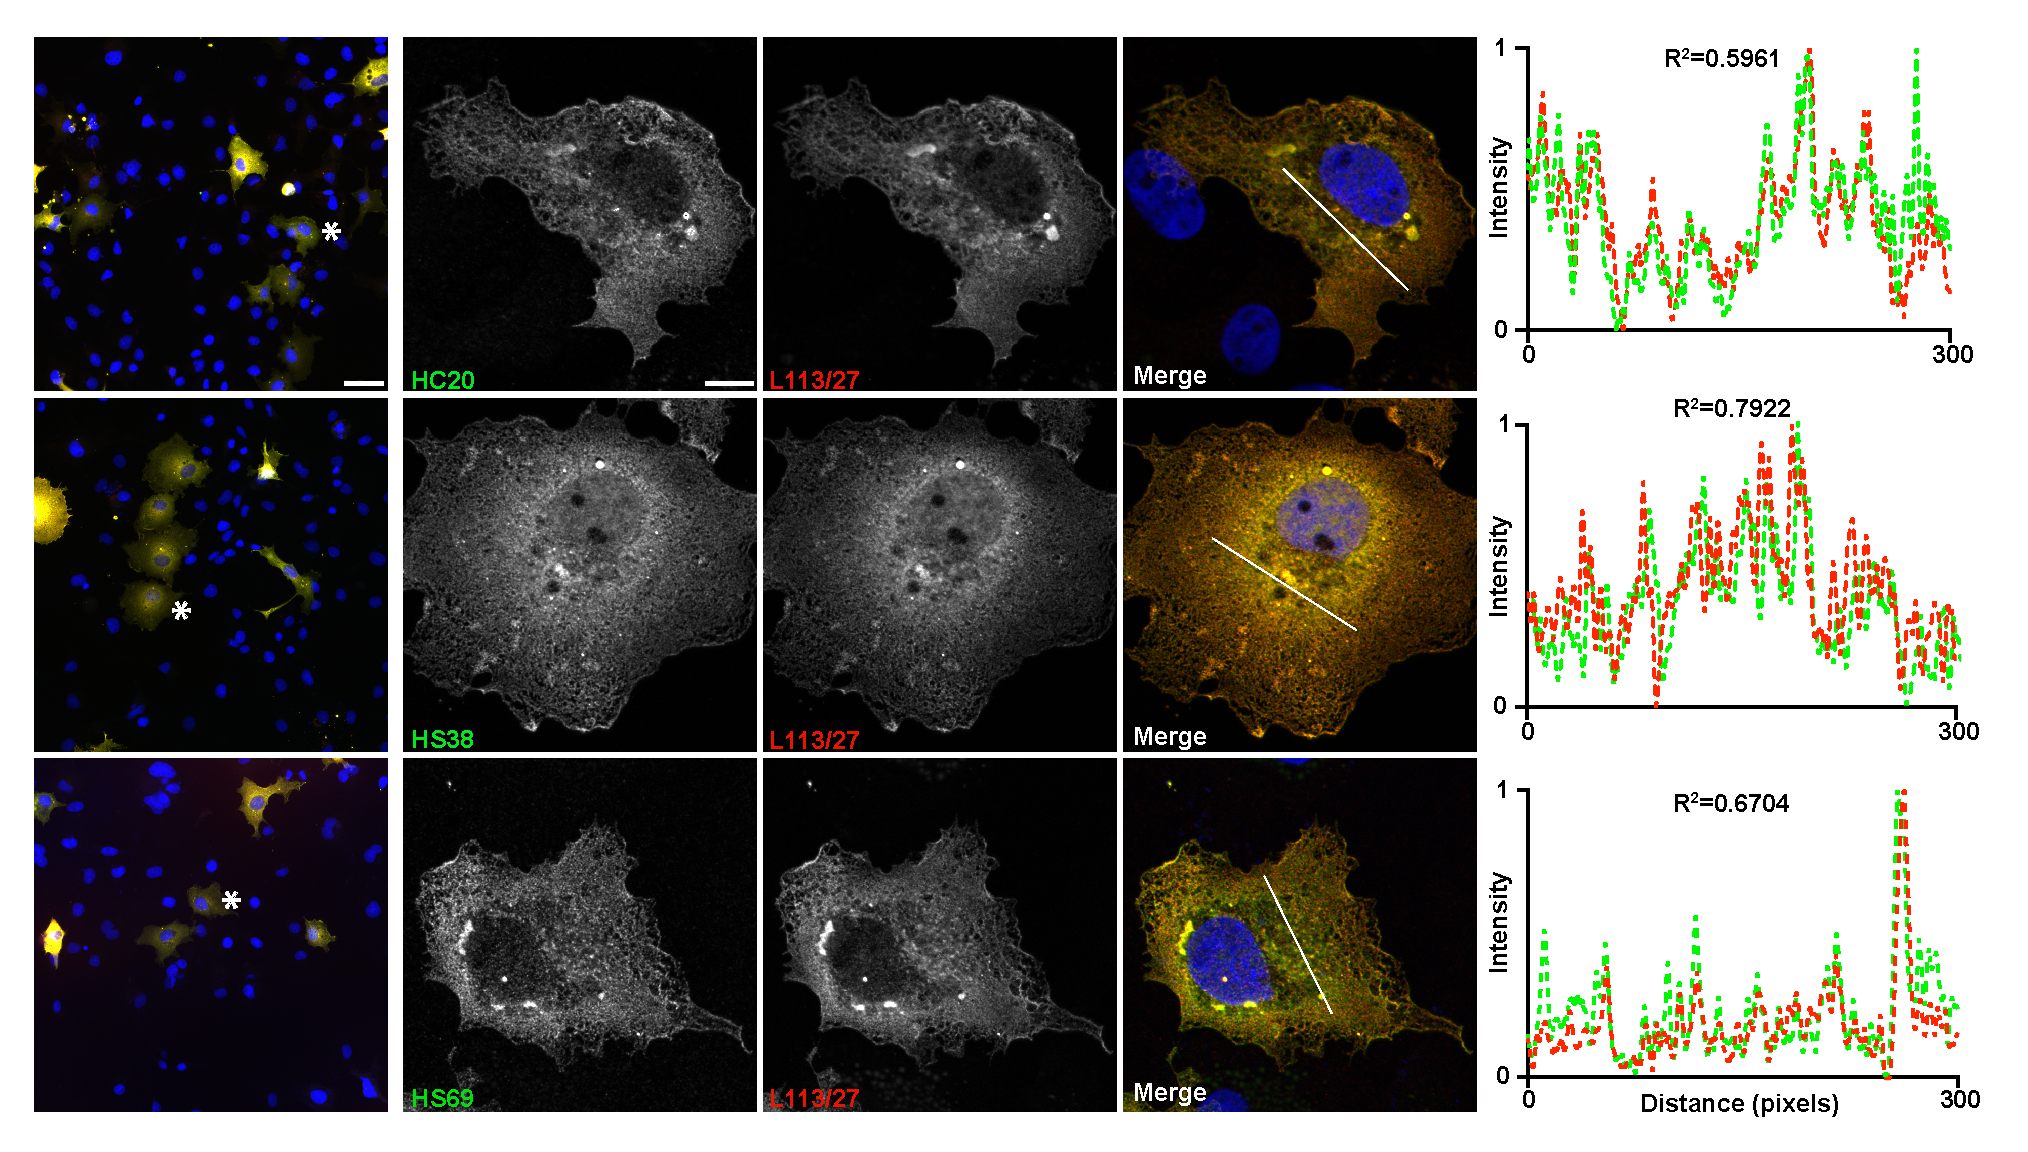

Supplement: supp [file elife-48750-supp-v1.zip › elife_poa_e48750_Figure_1_figure_supplement_6.tif]
